# Supplementary material for: Panaxynol, a Bioactive Component of American Ginseng, Targets Macrophages and Suppresses Colitis in Mice
Source: Preprints.org preprint supplement (doi:10.20944/preprints201803.0146.v1), 2018-03-19
Supplement: Supplementary file 2 [file supplementary]

| Group | DSS | Panaxynol  |
|-------|-----|------------|
| 1     | -   | -          |
| 2     | +   | -          |
| 3     | +   | 0.01 mg/kg |
| 4     | +   | 0.1 mg/kg  |
| 5     | +   | 0.5 mg/kg  |
| 6     | +   | 1 mg/kg    |
