# Supplementary figures and images for: Panaxynol, a Bioactive Component of American Ginseng, Targets Macrophages and Suppresses Colitis in Mice
Source: Preprints.org preprint supplement (doi:10.20944/preprints201803.0146.v1), 2018-03-19

### A) ANA-1

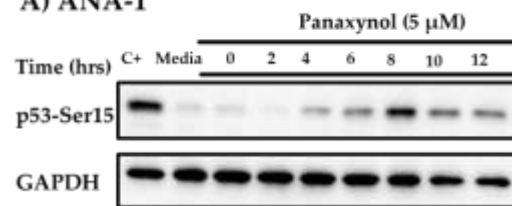

### B) Activated ANA-1 (M1)

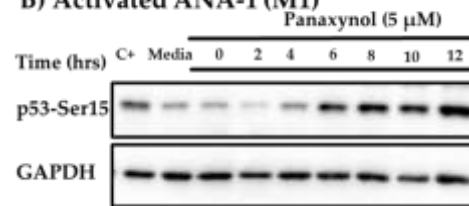

Supplement: Supplementary file 1 [file supplementary]

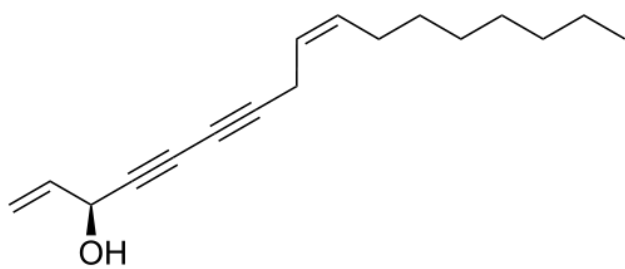

Supplement: Supplementary file 3 [file supplementary]

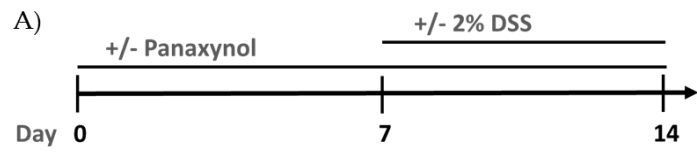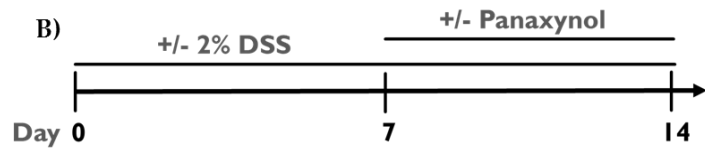

Supplement: Supplementary file 4 [file supplementary]

A)

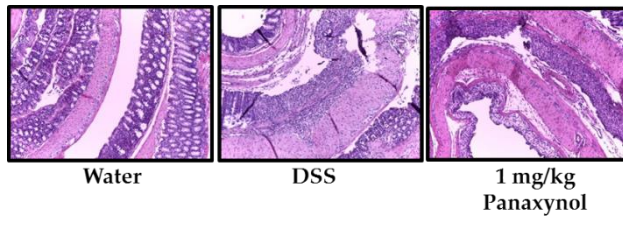

B)

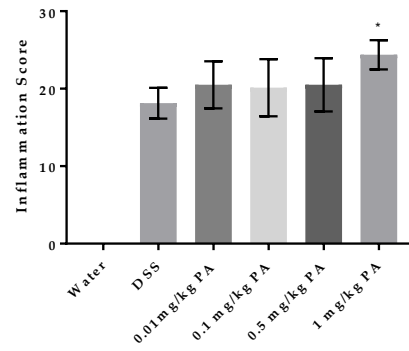

Supplement: Supplementary file 5 [file supplementary]

A)

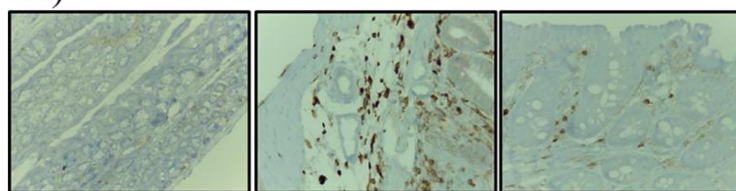

Water

DSS

1 mg/kg  
Panaxynol

B)

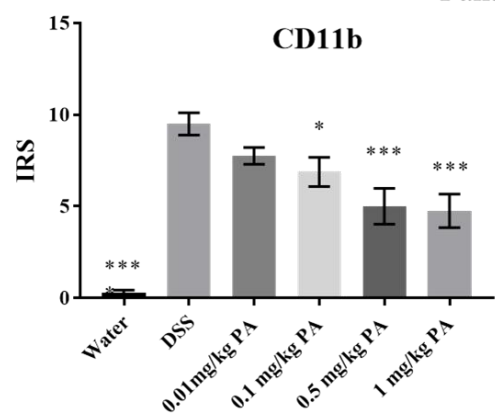

Supplement: Supplementary file 6 [file supplementary]
